# Supplementary material for: MONARCH 3 final PFS: a randomized study of abemaciclib as initial therapy for advanced breast cancer
Source: PubMed Central journal article supplement (PMC6336880; doi:10.1038/s41523-018-0097-z), 2019-01-17
Supplement: 41523_2018_97_MOESM1_ESM.pdf [file 41523_2018_97_MOESM1_ESM.pdf]

**Supplementary Table S1.** Discontinuation due to AEs (safety population)

| >1 patient in any arm                                      | abemaciclib plus nonsteroidal AI<br>(n = 327)<br>n (%) | placebo plus nonsteroidal AI<br>(n = 161)<br>n (%) |
|------------------------------------------------------------|--------------------------------------------------------|----------------------------------------------------|
| <b>Patients Discontinued Any Study Drug due to AE</b>      | <b>82 (25.1)</b>                                       | <b>7 (4.3)</b>                                     |
| Neutropenia                                                | 9 (2.8)                                                | 0                                                  |
| ALT increased                                              | 7 (2.1)                                                | 0                                                  |
| Lung infection                                             | 7 (2.1)                                                | 0                                                  |
| Diarrhea                                                   | 6 (1.8)                                                | 0                                                  |
| Nausea                                                     | 5 (1.5)                                                | 0                                                  |
| Chronic kidney disease                                     | 4 (1.2)                                                | 0                                                  |
| Embolism                                                   | 4 (1.2)                                                | 0                                                  |
| Anemia                                                     | 3 (0.9)                                                | 0                                                  |
| Blood creatinine increased                                 | 3 (0.9)                                                | 0                                                  |
| Dyspnea                                                    | 3 (0.9)                                                | 0                                                  |
| Lymphopenia                                                | 2 (0.6)                                                | 0                                                  |
| Thrombocytopenia                                           | 2 (0.6)                                                | 0                                                  |
| AST increased                                              | 2 (0.6)                                                | 0                                                  |
| Pneumonitis                                                | 2 (0.6)                                                | 0                                                  |
| Pulmonary fibrosis                                         | 2 (0.6)                                                | 0                                                  |
| Weight decreased                                           | 2 (0.6)                                                | 0                                                  |
| Rash                                                       | 2 (0.6)                                                | 0                                                  |
| <b>Patients Discontinued All Study Treatment due to AE</b> | <b>54 (16.5)</b>                                       | <b>5 (3.1)</b>                                     |
| Alanine aminotransferase increased                         | 6 (1.8)                                                | 0                                                  |
| Lung infection                                             | 6 (1.8)                                                | 0                                                  |
| Diarrhea                                                   | 4 (1.2)                                                | 0                                                  |
| Embolism                                                   | 4 (1.2)                                                | 0                                                  |
| Neutropenia                                                | 3 (0.9)                                                | 0                                                  |
| Aspartate aminotransferase increased                       | 2 (0.6)                                                | 0                                                  |
| Weight decreased                                           | 2 (0.6)                                                | 0                                                  |
| Thrombocytopenia                                           | 2 (0.6)                                                | 0                                                  |
| Dyspnea                                                    | 2 (0.6)                                                | 0                                                  |
| Pulmonary fibrosis                                         | 2 (0.6)                                                | 0                                                  |
| Chronic kidney disease                                     | 2 (0.6)                                                | 0                                                  |

*Note: Discontinuation of study treatment means that abemaciclib or placebo and NSAID were discontinued.*

**Supplementary Table S2.** Dose reductions for patients who discontinued abemaciclib or placebo due to non-fatal AEs

| <b>Patients who discontinued due to non-fatal AEs<sup>a</sup>, <i>n</i> (%)</b> | <b>abemaciclib plus nonsteroidal AI<br/>(<i>n</i> = 74)</b> | <b>placebo plus nonsteroidal AI<br/>(<i>n</i> = 3)</b> |
|---------------------------------------------------------------------------------|-------------------------------------------------------------|--------------------------------------------------------|
| Number of dose reductions                                                       |                                                             |                                                        |
| 0                                                                               | 37 (50.0)                                                   | 2 (66.7)                                               |
| 1                                                                               | 14 (18.9)                                                   | 1 (33.3)                                               |
| 2                                                                               | 23 (31.1)                                                   | 0 (0.0)                                                |

<sup>a</sup>Fatal AEs were not included in the analysis.

Abbreviation: AEs, adverse events.

**Supplementary Table S3.** Dose reduction level versus PFS

| Reduced dose vs protocol dose (150 mg <sup>a</sup> ) | Events<br>(Alternative) | Events<br>(Reference) | HR    | 95% CI      | <i>P</i> <sup>b</sup> |
|------------------------------------------------------|-------------------------|-----------------------|-------|-------------|-----------------------|
| 100 mg vs 150 mg                                     | 22                      | 62                    | 0.764 | 0.467-1.251 | 0.2849                |
| 50 mg vs 150 mg                                      | 11                      | 62                    | 0.985 | 0.511-1.902 | 0.9650                |

<sup>a</sup>Reference dose

<sup>b</sup>Wald's test

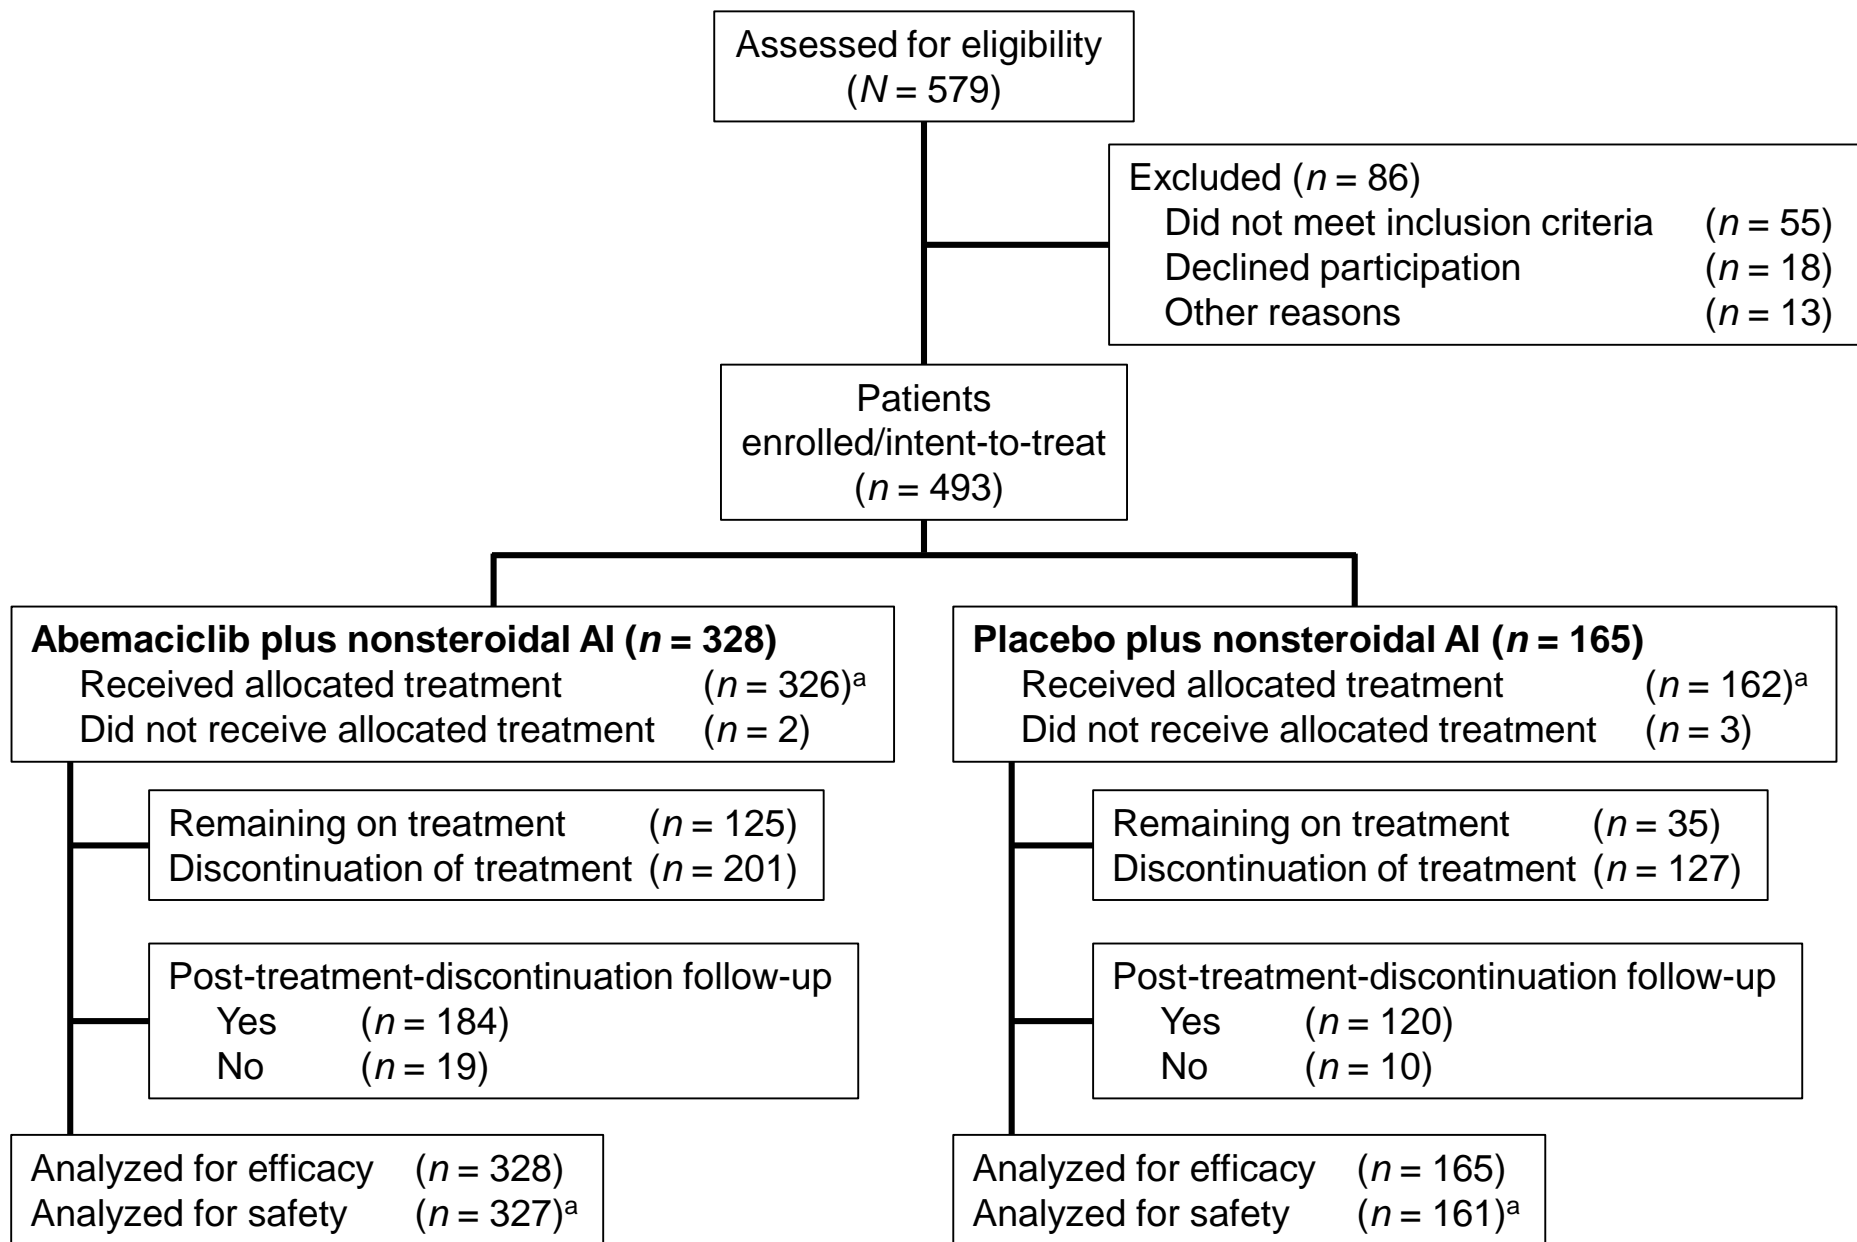

**Supplementary Figure S1.** CONSORT flow diagram.<sup>21</sup> <sup>a</sup>One patient who was randomized to the placebo arm received abemaciclib treatment in the first cycle and was counted in the safety population of the abemaciclib arm.

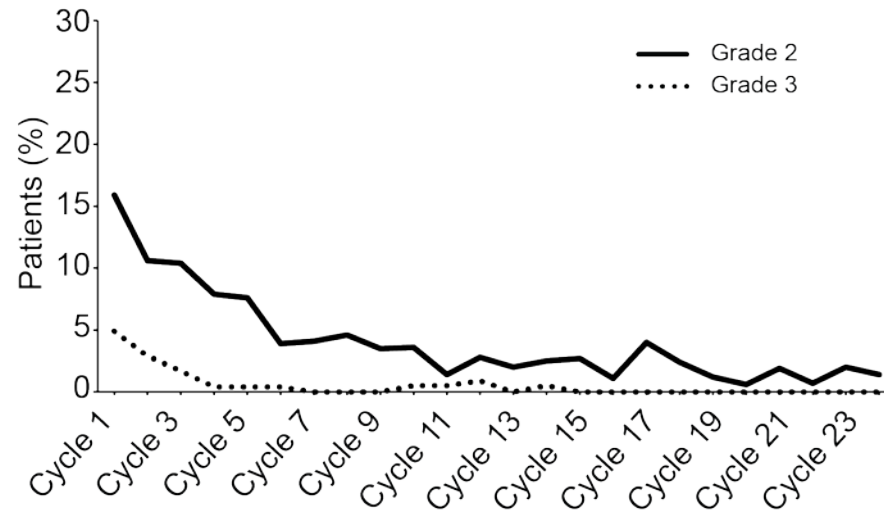

**Supplementary Fig. S2.**

Patients with Grade 2 or 3 diarrhea by cycle in the abemaciclib arm.

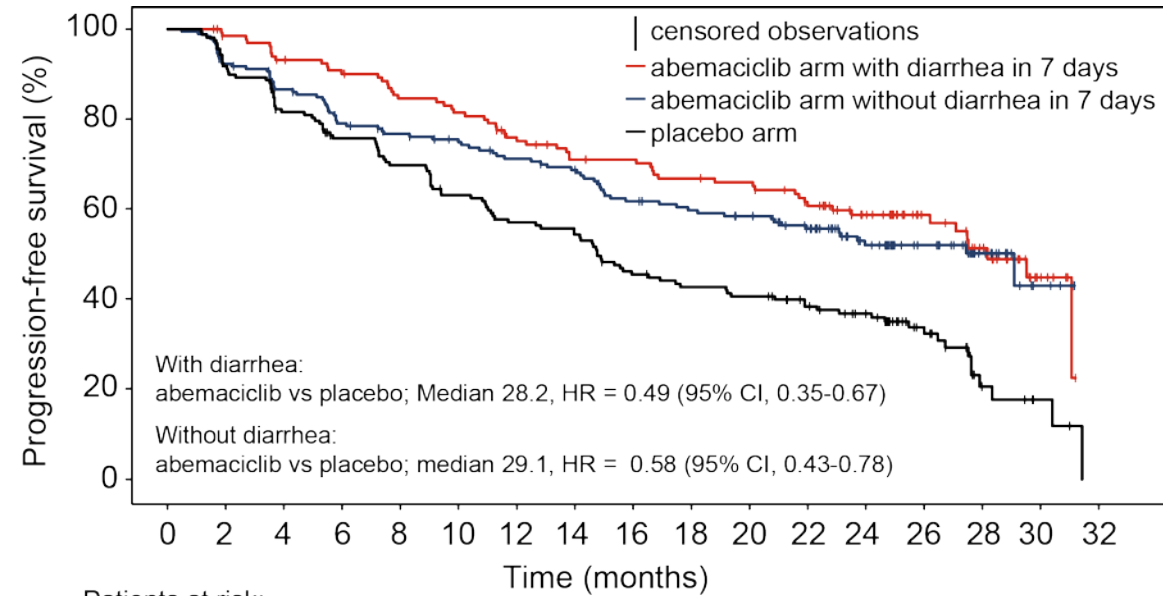

Patients at risk:

abemaciclib + nonsteroidal AI with diarrhea

134 131 122 117 109 105 94 88 86 80 78 69 53 34 23 8

abemaciclib + nonsteroidal AI without diarrhea

183 165 152 136 129 123 116 111 97 92 88 78 55 36 19 4

placebo + nonsteroidal AI

159 145 127 115 106 96 85 82 67 62 59 52 43 25 8 4

### Supplementary Fig. S3.

Relationship between early diarrhea and PFS. PFS of patients with or without diarrhea (any grade) within the first 7 days of treatment. Note: PFS events occurring prior to day 7 were excluded from the analysis.
